# Supplementary material
Source: PubMed Central journal article supplement (PMC6292526)

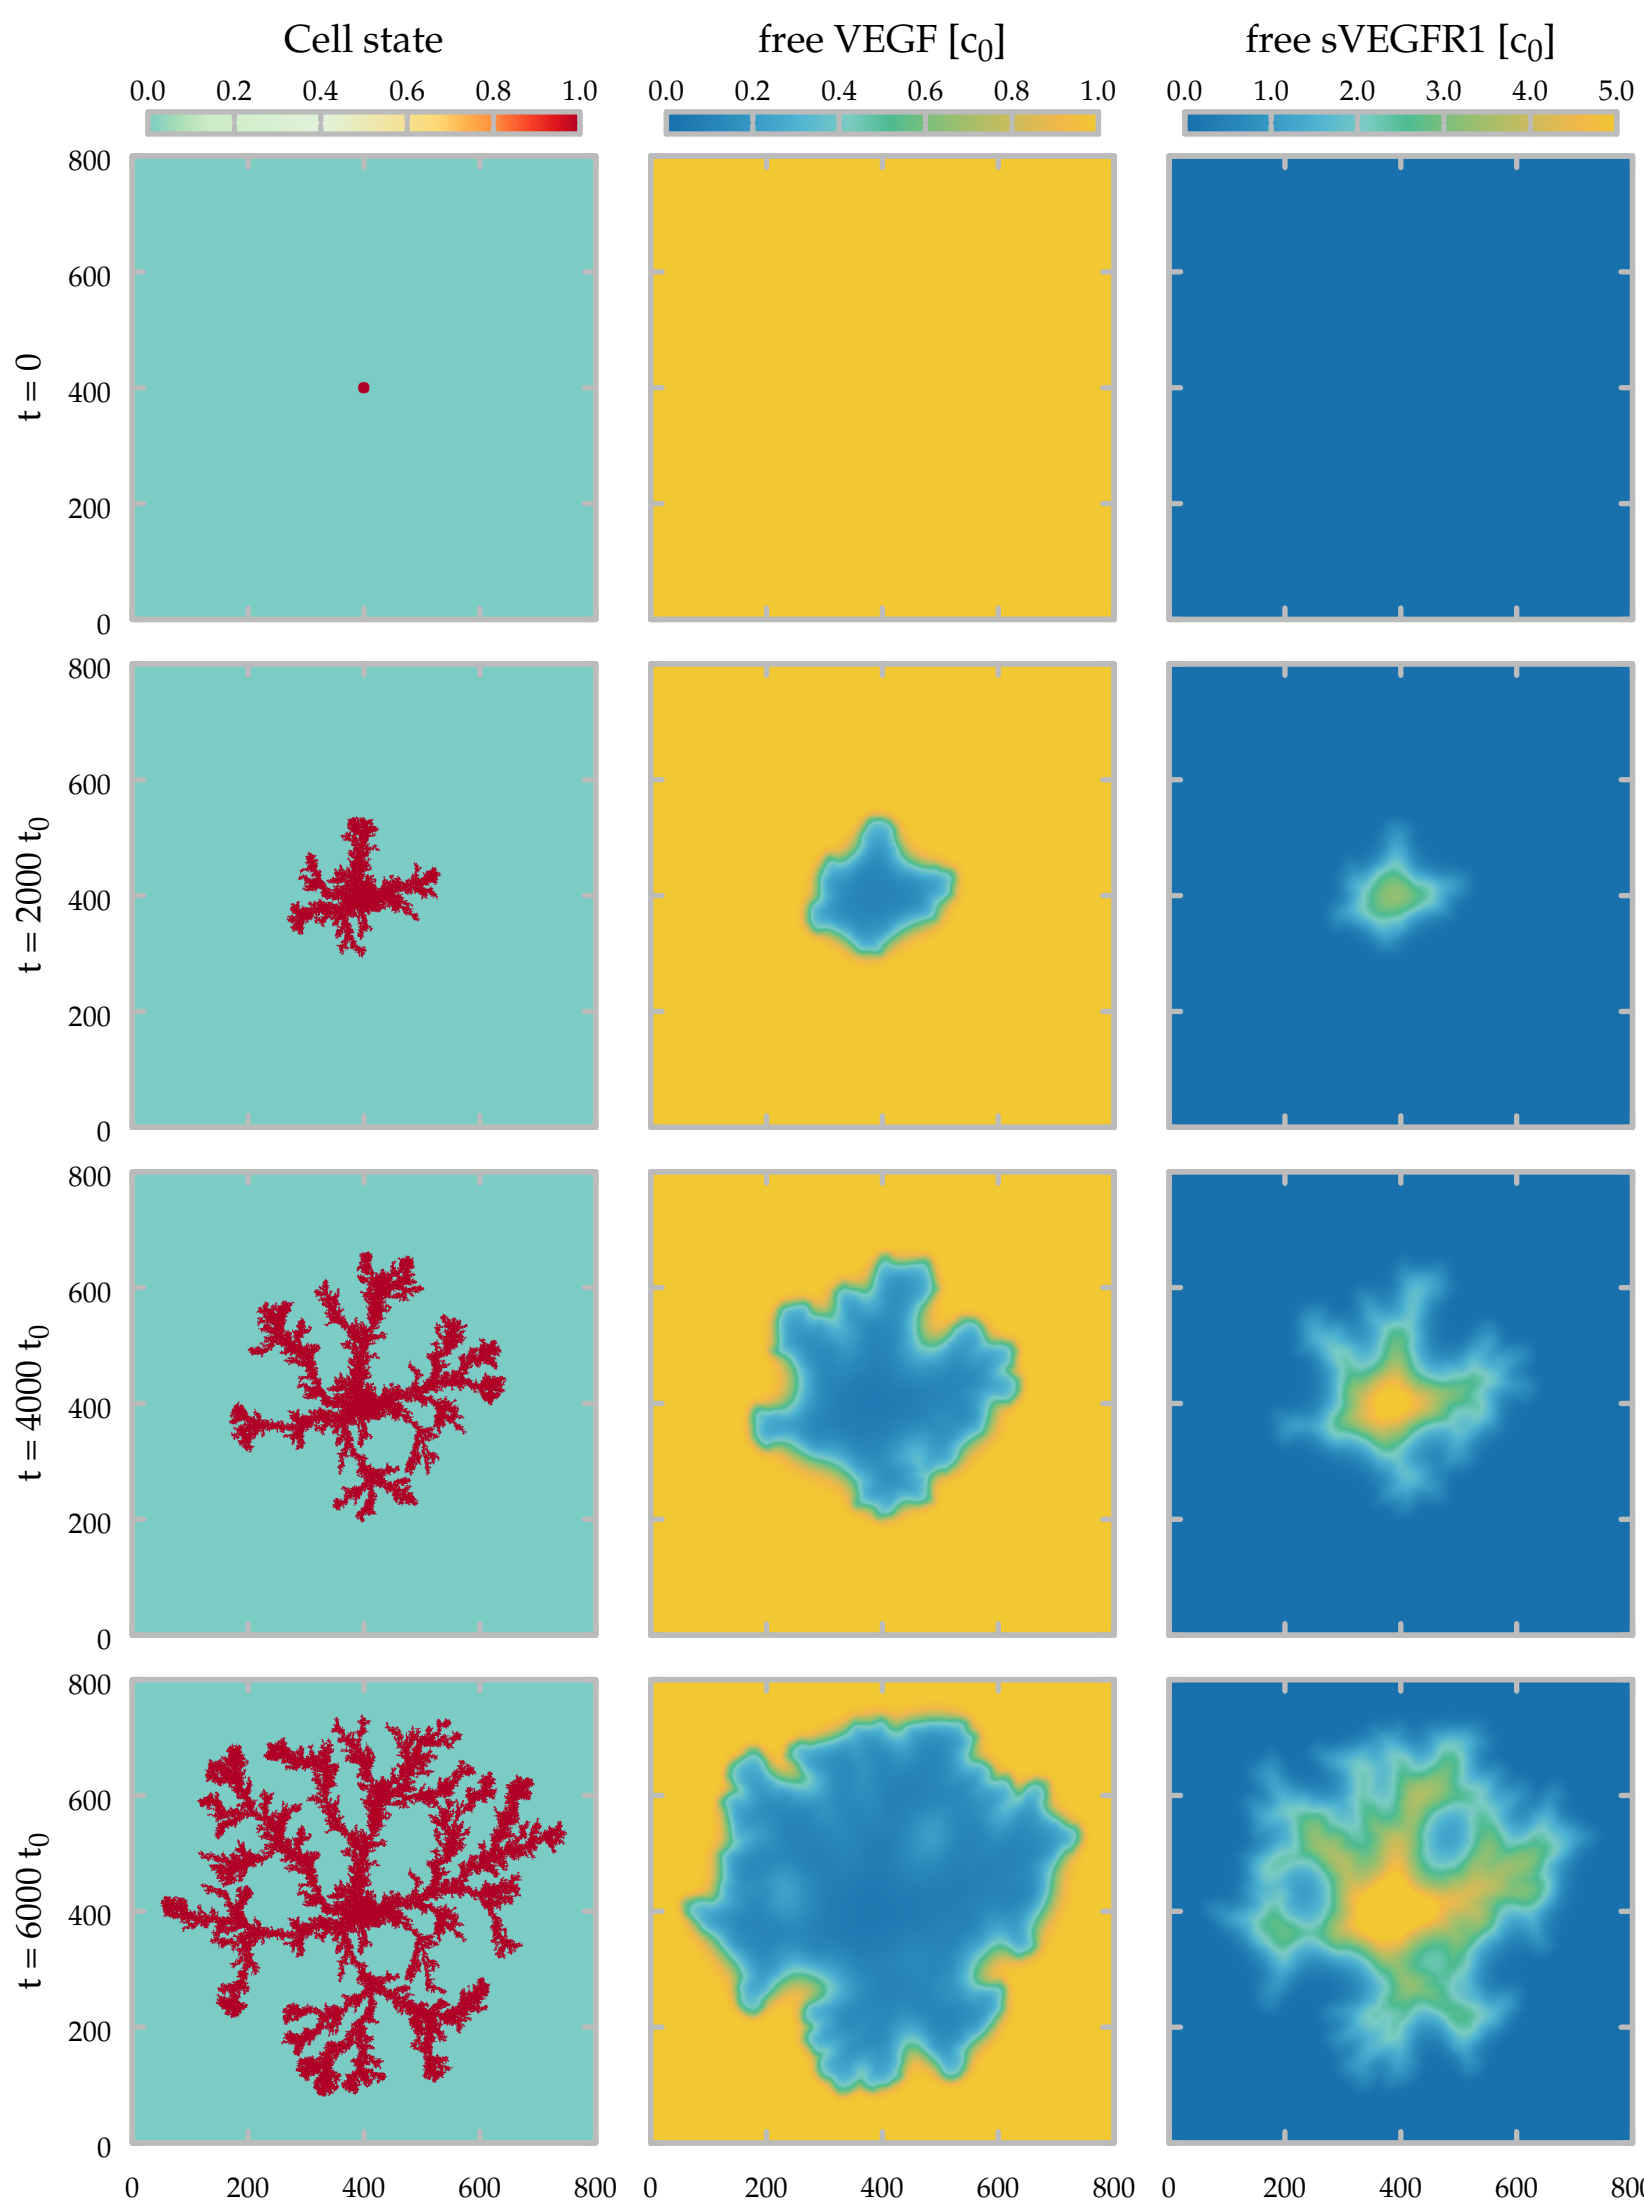

Supplement: NIHMS1504565-supplement-3.pdf [file NIHMS1504565-supplement-3.pdf]

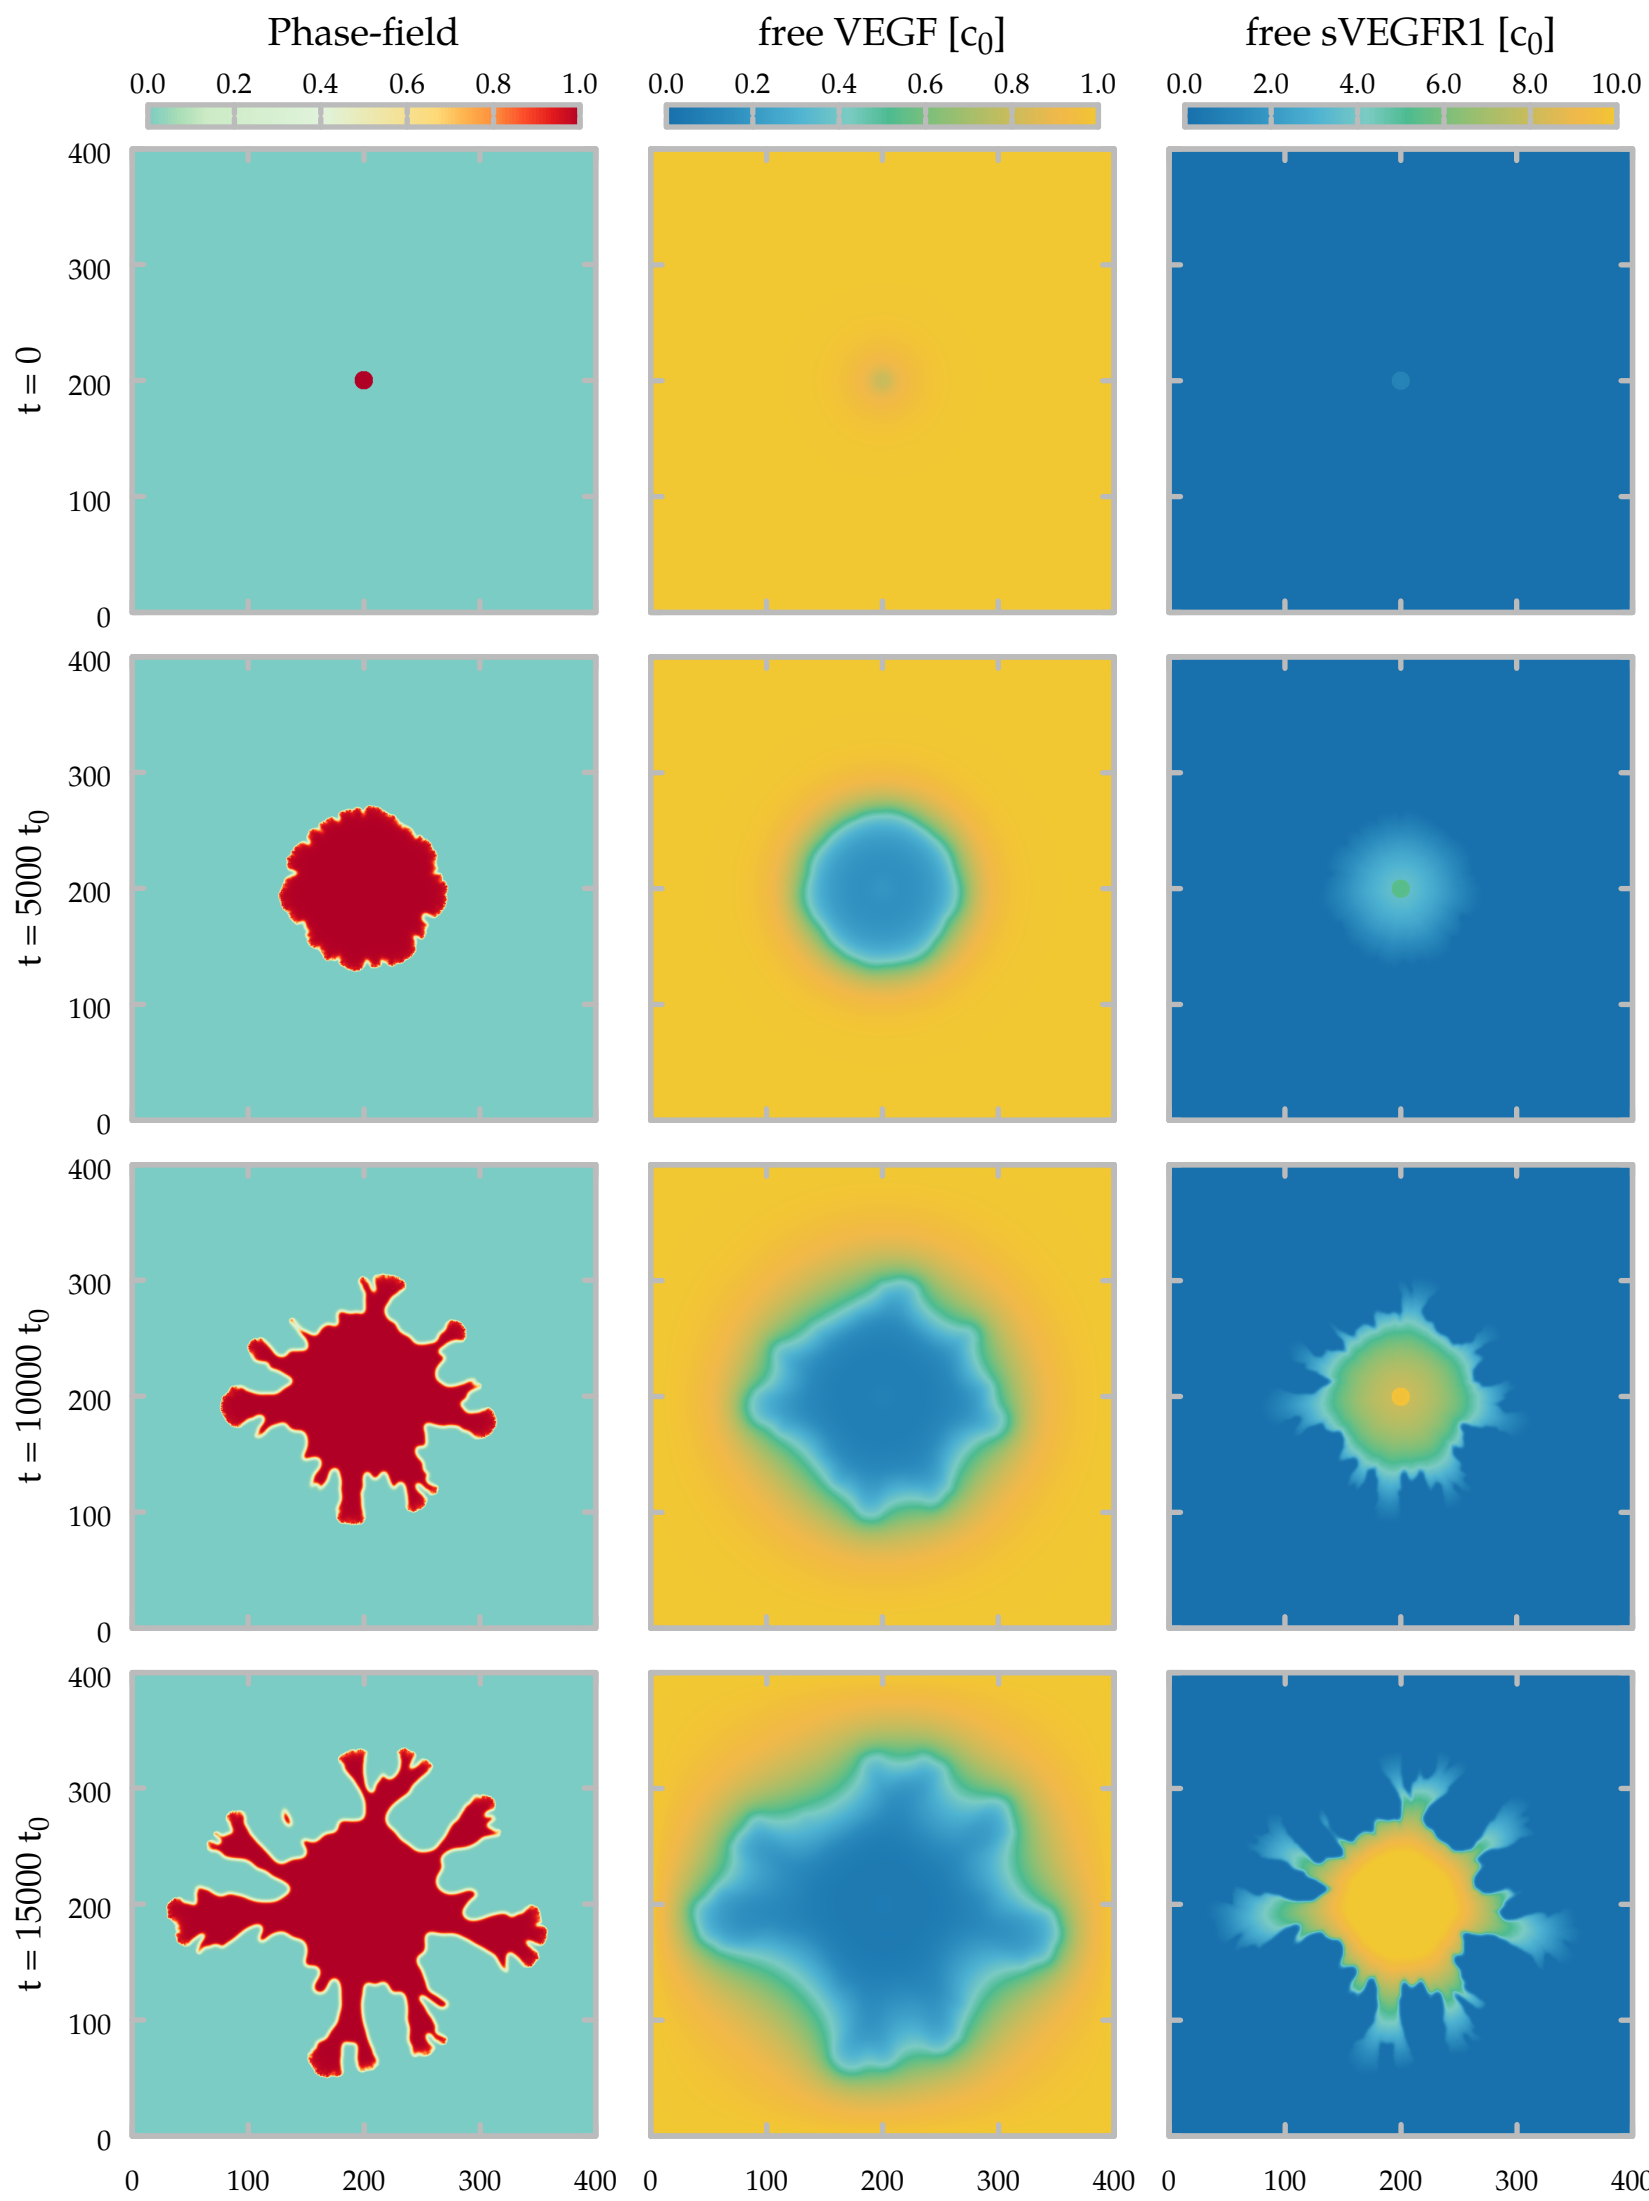

Supplement: NIHMS1504565-supplement-5.pdf [file NIHMS1504565-supplement-5.pdf]

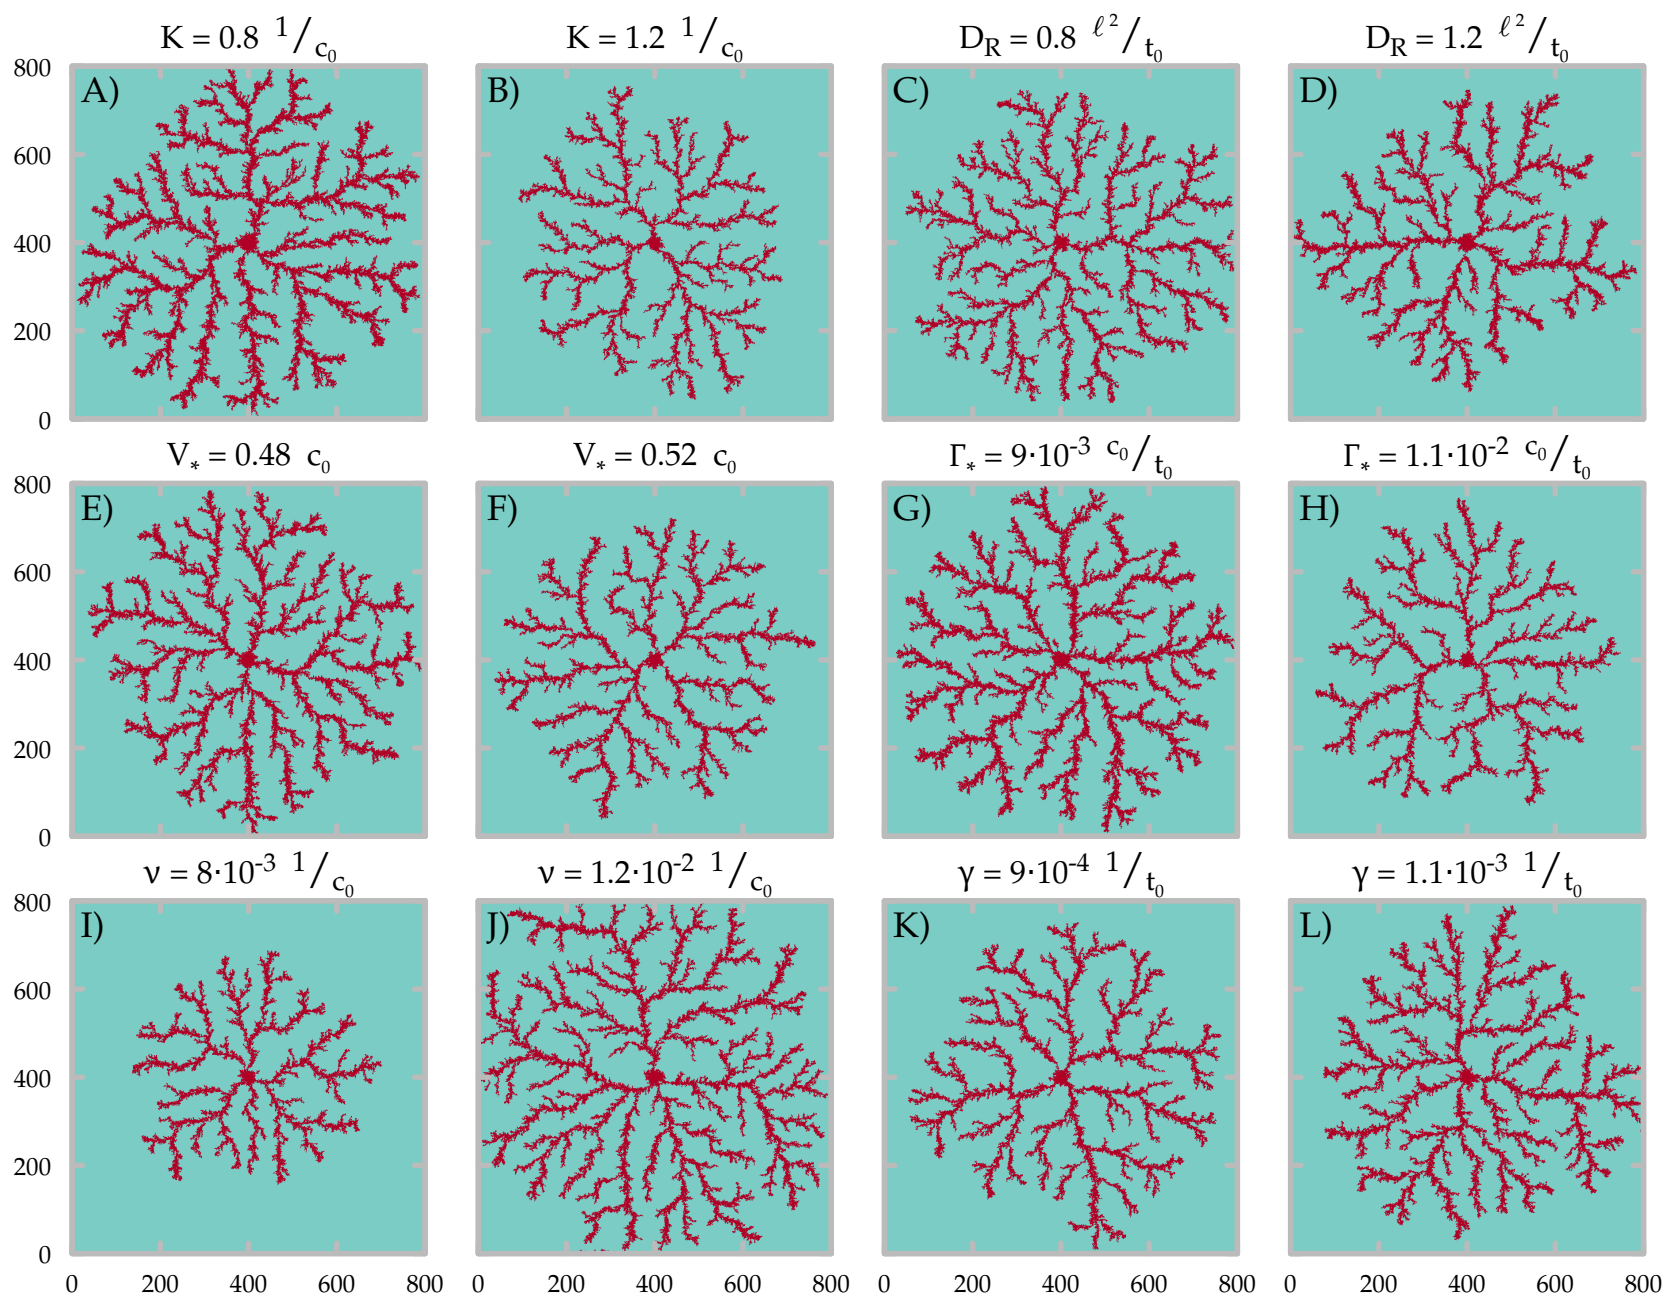

Supplement: NIHMS1504565-supplement-6.pdf [file NIHMS1504565-supplement-6.pdf]

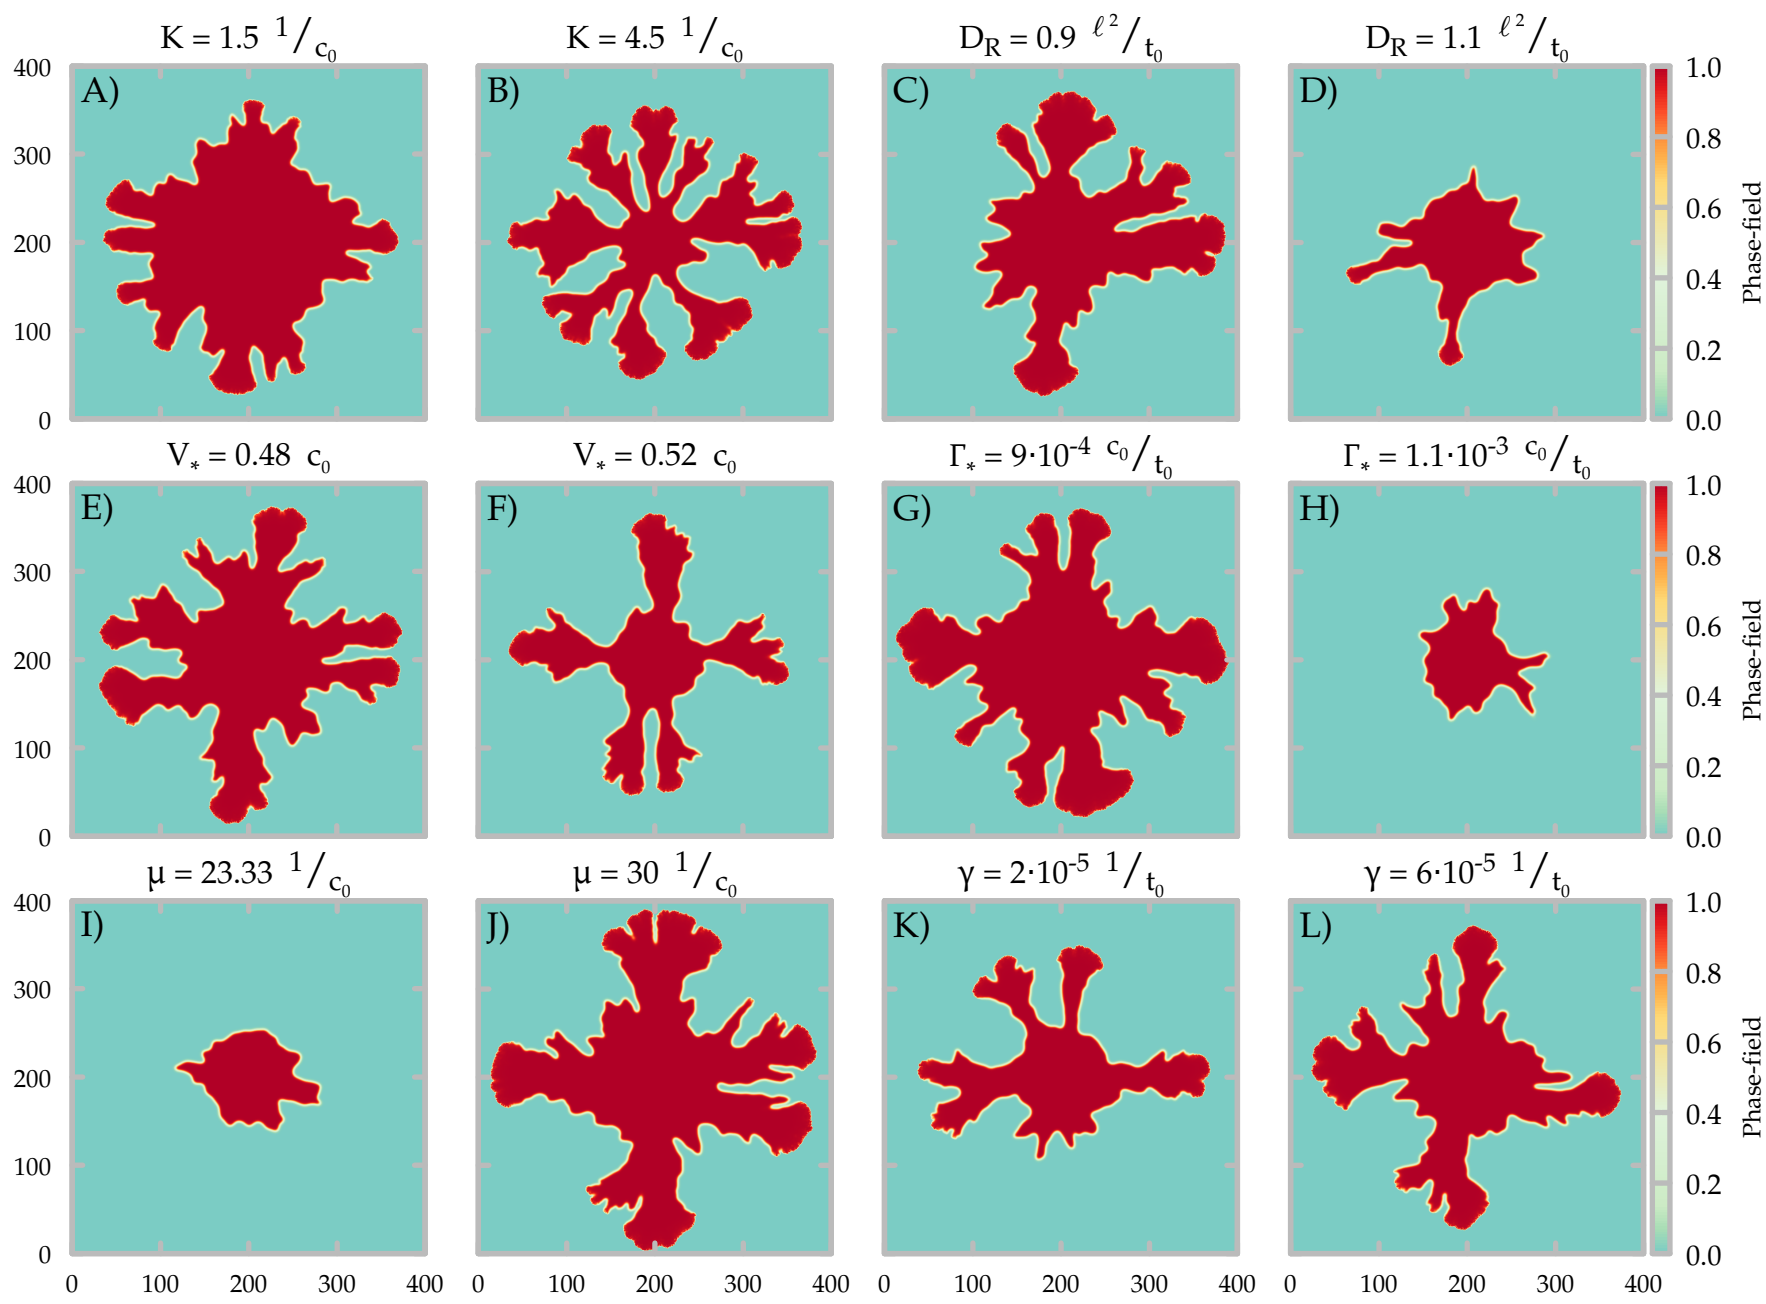

Supplement: NIHMS1504565-supplement-7.pdf [file NIHMS1504565-supplement-7.pdf]
